# Supplementary material for: A High Throughput Screening HPLC-FLD Method for Paralytic Shellfish Toxins (PSTs) Enabling Effective Official Control
Source: MDPI journal article supplement (doi:10.3390/molecules27154702), 2022-07-22
Supplement: s1 [file s1]

# A High Throughput Screening HPLC-FLD Method for Paralytic Shellfish Toxins (PSTs) Enabling Effective Official Control

Melania Siracusa <sup>1</sup>, Simone Bacchiocchi <sup>1</sup>, Alessandra Dubbini <sup>1,\*</sup>, Debora Campacci <sup>1</sup>, Tamara Tavoloni <sup>1</sup>, Arianna Stramenga <sup>1</sup>, Martina Ciriaci <sup>1</sup>, Sonia Dall'Ara <sup>2</sup> and Arianna Piersanti <sup>1,\*</sup>

<sup>1</sup> Istituto Zooprofilattico Sperimentale Umbria e Marche “Togo Rosati”, Via Cupa di Posatora, 3, 60131 Ancona, Italy; m.siracusa@izsum.it (M.S.); s.bacchiocchi@izsum.it (S.B.); d.campacci@izsum.it (D.C.); t.tavoloni@izsum.it (T.T.); a.stramenga@izsum.it (A.S.); m.ciriaci@izsum.it (M.C.)

<sup>2</sup> Fondazione Centro Ricerche Marine, Viale A. Vespucci, 2, 47042 Cesenatico, FC, Italy; sonia.dallara@centroricerchemarine.it

\* Correspondence: a.dubbini@izsum.it (A.D.); a.piersanti@izsum.it (A.P.); Tel.: +071-41760 (A.D. & A.P.)

**Table S1.** Mussels and gastropods sample chromatographic peak areas measured during validation.

| Mussels samples chromatographic peak areas of 5 samples spiked at total PST 600 µg STX eqv/kg analysed in 5 different days |        |        |        |        |        |        |       |      |
|----------------------------------------------------------------------------------------------------------------------------|--------|--------|--------|--------|--------|--------|-------|------|
|                                                                                                                            | I      | II     | III    | IV     | V      | mean   | SD    | CV % |
| <b>I day</b>                                                                                                               |        |        |        |        |        |        |       |      |
| GT1,4                                                                                                                      | 118916 | 119590 | 110446 | 118657 | 113496 | 116221 | 4041  | 3.5  |
| C1,2                                                                                                                       | 62413  | 63375  | 57481  | 67116  | 68967  | 63870  | 4464  | 7.0  |
| dcNEO                                                                                                                      | 173456 | 172691 | 161963 | 169356 | 175099 | 170513 | 5217  | 3.1  |
| dcSTX                                                                                                                      | 140278 | 128480 | 122513 | 139093 | 134602 | 132993 | 7468  | 5.6  |
| GTX2,3                                                                                                                     | 516459 | 513401 | 469931 | 498191 | 511220 | 501840 | 19150 | 3.8  |
| GTX5                                                                                                                       | 21559  | 22452  | 21177  | 24407  | 25983  | 23115  | 2032  | 8.8  |
| STX                                                                                                                        | 90067  | 87046  | 85996  | 94200  | 100415 | 91545  | 5894  | 6.4  |
| <b>II day</b>                                                                                                              |        |        |        |        |        |        |       |      |
| GT1,4                                                                                                                      | 119256 | 121697 | 120233 | 114765 | 113144 | 117819 | 3678  | 3.1  |
| C1,2                                                                                                                       | 68640  | 63924  | 62120  | 61117  | 62294  | 63619  | 2982  | 4.7  |
| dcNEO                                                                                                                      | 178409 | 170593 | 160417 | 154040 | 161166 | 164925 | 9577  | 5.8  |
| dcSTX                                                                                                                      | 145650 | 141020 | 131370 | 130796 | 134588 | 136684 | 6452  | 4.7  |
| GTX2,3                                                                                                                     | 575106 | 507817 | 477713 | 470305 | 468962 | 499980 | 44844 | 9.0  |
| GTX5                                                                                                                       | 24027  | 22994  | 21420  | 21125  | 22920  | 22497  | 1205  | 5.4  |
| STX                                                                                                                        | 80736  | 83598  | 74584  | 74469  | 82020  | 79081  | 4280  | 5.4  |
| <b>III day</b>                                                                                                             |        |        |        |        |        |        |       |      |
| GT1,4                                                                                                                      | 96531  | 101245 | 97105  | 99778  | 98680  | 98668  | 1929  | 2.0  |
| C1,2                                                                                                                       | 40728  | 43757  | 43147  | 44157  | 43573  | 43072  | 1360  | 3.2  |
| dcNEO                                                                                                                      | 160965 | 157960 | 153608 | 141911 | 146894 | 152268 | 7842  | 5.2  |
| dcSTX                                                                                                                      | 118203 | 114427 | 121088 | 114817 | 117725 | 117252 | 2727  | 2.3  |
| GTX2,3                                                                                                                     | 477576 | 479955 | 446070 | 468725 | 503084 | 475082 | 20593 | 4.3  |
| GTX5                                                                                                                       | 17113  | 14986  | 15759  | 14845  | 15481  | 15637  | 904   | 5.8  |
| STX                                                                                                                        | 74455  | 68772  | 71300  | 65882  | 69781  | 70038  | 3164  | 4.5  |
| <b>IV day</b>                                                                                                              |        |        |        |        |        |        |       |      |
| GT1,4                                                                                                                      | 90291  | 90577  | 101363 | 91662  | 92630  | 93304  | 4599  | 4.9  |
| C1,2                                                                                                                       | 64154  | 62478  | 59647  | 54387  | 51580  | 58449  | 5336  | 9.1  |
| dcNEO                                                                                                                      | 125765 | 120607 | 124741 | 122102 | 123853 | 123413 | 2066  | 1.7  |
| dcSTX                                                                                                                      | 81228  | 73723  | 69515  | 73032  | 72805  | 74060  | 4324  | 5.8  |
| GTX2,3                                                                                                                     | 423906 | 401936 | 366129 | 335117 | 438737 | 393165 | 42424 | 10.8 |
| GTX5                                                                                                                       | 18289  | 19744  | 18146  | 20746  | 18600  | 19105  | 1111  | 5.8  |
| STX                                                                                                                        | 63675  | 62963  | 62224  | 64697  | 62878  | 63287  | 941   | 1.5  |
| <b>V day</b>                                                                                                               |        |        |        |        |        |        |       |      |
| GT1,4                                                                                                                      | 93146  | 90296  | 111975 | 90921  | 90349  | 95337  | 9373  | 9.8  |

| C1,2                                                                                                                      | 55212  | 55468  | 59065  | 54869  | 61067  | 57136  | 2775  | 4.9  |
|---------------------------------------------------------------------------------------------------------------------------|--------|--------|--------|--------|--------|--------|-------|------|
| dcNEO                                                                                                                     | 142563 | 142015 | 146455 | 145922 | 136710 | 142733 | 3900  | 2.7  |
| dcSTX                                                                                                                     | 133631 | 127941 | 164352 | 142641 | 115044 | 136722 | 18406 | 13.5 |
| GTX2,3                                                                                                                    | 458527 | 439589 | 534399 | 413238 | 299953 | 429141 | 85139 | 19.8 |
| GTX5                                                                                                                      | 20977  | 19718  | 28629  | 25955  | 18462  | 22748  | 4346  | 19.1 |
| STX                                                                                                                       | 82972  | 78276  | 96479  | 86840  | 66351  | 82183  | 11097 | 13.5 |
| <b>Gastropods samples chromatographic peak areas of 5 samples spiked at total PST 600 µg STX eqv/kg analysed in 1 day</b> |        |        |        |        |        |        |       |      |
|                                                                                                                           | I      | II     | III    | IV     | V      | mean   | SD    | CV % |
| <b>I day</b>                                                                                                              |        |        |        |        |        |        |       |      |
| GT1,4                                                                                                                     | 84742  | 107050 | 80542  | 114890 | 82138  | 93872  | 15923 | 17.0 |
| C1,2                                                                                                                      | 36640  | 49175  | 36904  | 52662  | 34397  | 41955  | 8331  | 19.9 |
| dcNEO                                                                                                                     | 142902 | 165839 | 141778 | 162332 | 141067 | 150783 | 12224 | 8.1  |
| dcSTX                                                                                                                     | 151275 | 176024 | 147231 | 175102 | 130456 | 156018 | 19478 | 12.5 |
| GTX2,3                                                                                                                    | 324009 | 349304 | 310351 | 368692 | 303477 | 331167 | 27333 | 8.3  |
| GTX5                                                                                                                      | 25041  | 30265  | 24184  | 34371  | 20649  | 26902  | 5409  | 20.1 |
| STX                                                                                                                       | 62146  | 84488  | 62271  | 85855  | 62385  | 71429  | 12555 | 17.6 |

**Table S2.** Spiked mussels and gastropods samples recoveries during validation.

| <b>Spiked Mussels recoveries %</b> |    |    |     |    |    |      |    |      |
|------------------------------------|----|----|-----|----|----|------|----|------|
|                                    | I  | II | III | IV | V  | mean | SD | CV % |
| <b>I day</b>                       |    |    |     |    |    |      |    |      |
| GT1,4                              | 82 | 83 | 76  | 82 | 79 | 80   | 3  | 3.5  |
| C1,2                               | 78 | 79 | 72  | 84 | 86 | 79   | 6  | 7.0  |
| dcNEO                              | 76 | 76 | 71  | 74 | 77 | 75   | 2  | 3.1  |
| dcSTX                              | 90 | 83 | 79  | 90 | 87 | 86   | 5  | 5.6  |
| GTX2,3                             | 84 | 84 | 77  | 81 | 83 | 82   | 3  | 3.8  |
| GTX5                               | 66 | 69 | 65  | 75 | 80 | 71   | 6  | 8.8  |
| STX                                | 74 | 72 | 71  | 78 | 83 | 75   | 5  | 6.4  |
| <b>II day</b>                      |    |    |     |    |    |      |    |      |
| GT1,4                              | 80 | 82 | 81  | 77 | 76 | 79   | 2  | 3.1  |
| C1,2                               | 87 | 81 | 79  | 77 | 79 | 80   | 4  | 4.7  |
| dcNEO                              | 75 | 72 | 68  | 65 | 68 | 70   | 4  | 5.8  |
| dcSTX                              | 92 | 89 | 83  | 83 | 85 | 86   | 4  | 4.7  |
| GTX2,3                             | 88 | 77 | 73  | 72 | 71 | 76   | 7  | 9.0  |
| GTX5                               | 79 | 75 | 70  | 69 | 75 | 74   | 4  | 5.4  |
| STX                                | 80 | 82 | 73  | 73 | 81 | 78   | 4  | 5.4  |
| <b>III day</b>                     |    |    |     |    |    |      |    |      |
| GT1,4                              | 71 | 75 | 71  | 73 | 73 | 73   | 1  | 2.0  |
| C1,2                               | 80 | 86 | 85  | 87 | 86 | 85   | 3  | 3.2  |
| dcNEO                              | 59 | 58 | 57  | 52 | 54 | 56   | 3  | 5.2  |
| dcSTX                              | 73 | 71 | 75  | 71 | 73 | 72   | 2  | 2.3  |
| GTX2,3                             | 67 | 67 | 62  | 66 | 70 | 66   | 3  | 4.3  |
| GTX5                               | 81 | 71 | 75  | 70 | 73 | 74   | 4  | 5.8  |
| STX                                | 72 | 66 | 69  | 64 | 67 | 68   | 3  | 4.5  |
| <b>IV day</b>                      |    |    |     |    |    |      |    |      |
| GT1,4                              | 69 | 69 | 78  | 70 | 71 | 71   | 4  | 4.9  |
| C1,2                               | 87 | 84 | 81  | 73 | 70 | 79   | 7  | 9.1  |
| dcNEO                              | 83 | 79 | 82  | 80 | 81 | 81   | 1  | 1.7  |
| dcSTX                              | 80 | 72 | 68  | 72 | 71 | 73   | 4  | 5.8  |
| GTX2,3                             | 65 | 62 | 57  | 52 | 68 | 61   | 7  | 10.8 |
| GTX5                               | 61 | 66 | 61  | 69 | 62 | 64   | 4  | 5.8  |
| STX                                | 66 | 66 | 65  | 67 | 65 | 66   | 1  | 1.5  |
| <b>V day</b>                       |    |    |     |    |    |      |    |      |
| GT1,4                              | 69 | 67 | 83  | 67 | 67 | 71   | 7  | 9.8  |

|                                       |          |           |            |           |          |             |           |             |
|---------------------------------------|----------|-----------|------------|-----------|----------|-------------|-----------|-------------|
| C1,2                                  | 75       | 75        | 80         | 75        | 83       | 78          | 4         | 4.9         |
| dcNEO                                 | 54       | 54        | 55         | 55        | 52       | 54          | 1         | 2.7         |
| dcSTX                                 | 76       | 73        | 94         | 81        | 66       | 78          | 11        | 13.5        |
| GTX2,3                                | 65       | 63        | 76         | 59        | 43       | 61          | 12        | 19.8        |
| GTX5                                  | 68       | 64        | 92         | 84        | 60       | 73          | 14        | 19.1        |
| STX                                   | 73       | 69        | 85         | 76        | 58       | 72          | 10        | 13.5        |
| <b>Spiked Gastropods recoveries %</b> |          |           |            |           |          |             |           |             |
|                                       | <b>I</b> | <b>II</b> | <b>III</b> | <b>IV</b> | <b>V</b> | <b>mean</b> | <b>SD</b> | <b>CV %</b> |
| <b>I day</b>                          |          |           |            |           |          |             |           |             |
| GT1,4                                 | 56       | 71        | 53         | 76        | 54       | 62          | 11        | 17.0        |
| C1,2                                  | 63       | 85        | 64         | 91        | 59       | 72          | 14        | 19.9        |
| dcNEO                                 | 53       | 61        | 53         | 60        | 52       | 56          | 5         | 8.1         |
| dcSTX                                 | 102      | 119       | 100        | 119       | 88       | 106         | 13        | 12.5        |
| GTX2,3                                | 52       | 56        | 49         | 59        | 48       | 53          | 4         | 8.3         |
| GTX5                                  | 82       | 99        | 79         | 113       | 68       | 88          | 18        | 20.1        |
| STX                                   | 53       | 72        | 53         | 73        | 53       | 60          | 11        | 17.6        |

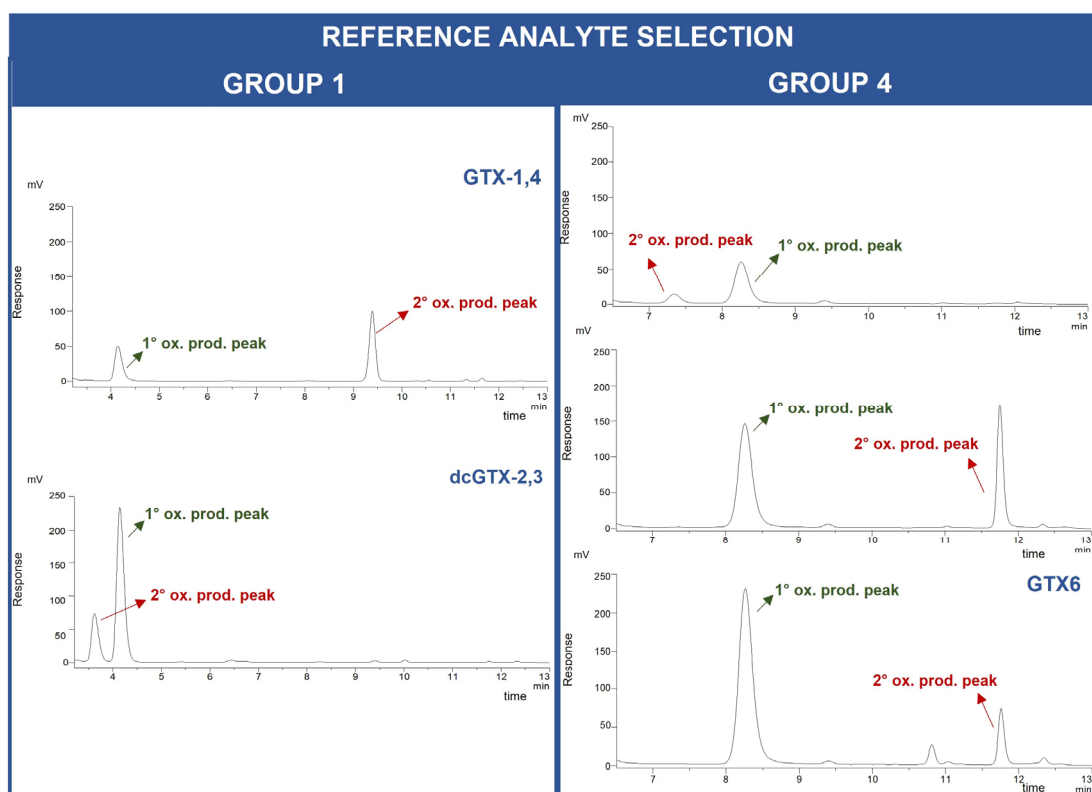

**Figure S1.** Group representative toxin selection in case of coelution (Group 1 and 4 listed in Table 4).

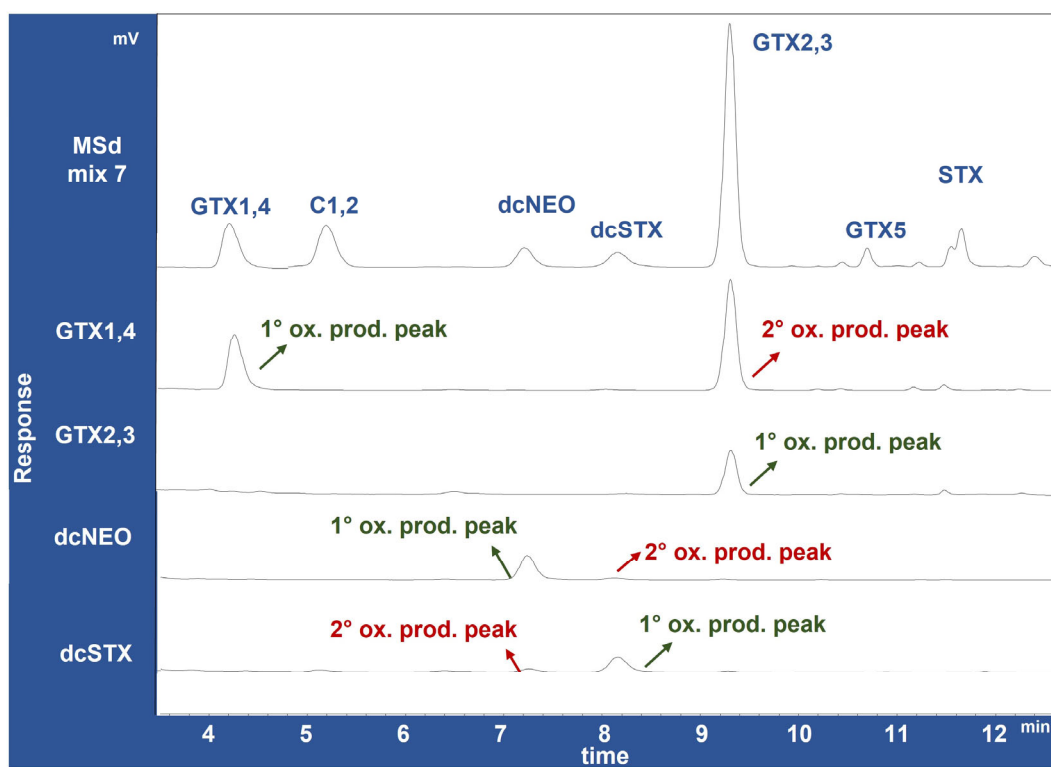

**Figure S2.** Standard Mix (MSd mix 7) chromatogram compared with single toxins chromatograms. Identification of first oxidation (in green) and secondary oxidation (in red) product peaks.
